# Supplementary material for: Effects of Long Non-Coding RNAs Induced by the Gut Microbiome on Regulating the Development of Colorectal Cancer
Source: MDPI journal article supplement (doi:10.3390/cancers14235813), 2022-11-25
Supplement: s1 [file s1]

**Table S1.** Mechanisms by which gut microbes and their metabolites impact the development of CRC through the regulation of lncRNAs.

| Name                                        | LncRNAs   | Possible mechanism                                                                                                                                                                                                                                                                                                               | Results                      | References   |
|---------------------------------------------|-----------|----------------------------------------------------------------------------------------------------------------------------------------------------------------------------------------------------------------------------------------------------------------------------------------------------------------------------------|------------------------------|--------------|
| <i>Fusobacterium nucleatum</i>              | EVADR     | <i>Fusobacterium nucleatum</i> upregulates EVADR, and elevated EVADR directs YBX1 to recruit EMT-related factors, thus enhancing the translation of them thereby inducing EMT.                                                                                                                                                   | Metastasis                   | [38–40]      |
|                                             | KRT7-AS   | <i>Fusobacterium nucleatum</i> infection activates the NF- $\kappa$ B pathway, and activated NF- $\kappa$ B P-p65 may upregulate KRT7-AS by increasing the transcriptional activity of KRT7-AS, and then activates the downstream target of KRT7-AS, KRT7.                                                                       | Metastasis                   | [17,45]      |
|                                             | ENO1-IT1  | <i>Fusobacterium nucleatum</i> upregulates the binding efficiency of SP1 to the promoter region of lncRNA ENO1- IT1 to activate the transcription of lncRNA ENO1- IT1 and subsequently recruit KAT7 to the promoter of the ENO1 gene to regulate ENO1 transcription via epigenetic modulation.                                   | Drug resistance              | [49–51]      |
|                                             | BFAL1     | ETBF upregulates BFAL1, and BFAL1 competes with miR-155-5p and miR-200a-3p, thus impeding the inhibitory effect of miR-155-5p and miR-200a-3p on RHEB. RHEB can regulate the mTOR-signaling pathway, leading to the activation of the mTOR pathway.                                                                              | Growth                       | [62]         |
| Enterotoxigenic <i>Bacteroides fragilis</i> | AERRIE    | ETBF increases the levels of JMJD2B, and then induces the expression of lncRNA AERRIE, which in turn induces the expression of SULF1 to activate canonical Wnt pathway.                                                                                                                                                          | Proliferation and metastasis | [8,66,68,71] |
| Butyrate (metabolite)                       | LncLy6C   | Butyrate-induced LncLy6C binds to the C/EBP $\beta$ and H3K4me3, specifically encouraging the enrichment of C/EBP $\beta$ and H3K4me3 marks on the promoter region of Nr4A1, thus enhancing the expression of Nr4A1. This promotes the differentiation of Ly6Chigh inflammatory monocytes into Ly6Cint/neg resident macrophages. | Reduction of inflammation    | [37,76–78]   |
| Lipopolysaccharide (metabolite)             | LINC00152 | Lipopolysaccharide introduces histone lactonization on the promoter of LINC00152 and reduces the binding efficiency of YY1 to LINC00152, thus upregulating the expression of LINC00152.                                                                                                                                          | Migration and invasion       | [36]         |

## References

- Zhou, L.; Jiang, J.; Huang, Z.; Jin, P.; Peng, L.; Luo, M.; Zhang, Z.; Chen, Y.; Xie, N.; Gao, W.; et al. Hypoxia-induced lncRNA STEAP3-AS1 activates Wnt/beta-catenin signaling to promote colorectal cancer progression by preventing m(6)A-mediated degradation of STEAP3 mRNA. *Mol. Cancer* 2022, 21, 168.
- Chen, S.; Su, T.; Zhang, Y.; Lee, A.; He, J.; Ge, Q.; Wang, L.; Si, J.; Zhuo, W.; Wang, L. *Fusobacterium nucleatum* promotes colorectal cancer metastasis by modulating KRT7-AS/KRT7. *Gut Microbes* 2020, 11, 511–525. <https://doi.org/10.1080/19490976.2019.1695494>.
- Wang, J.; Liu, Z.; Xu, Y.; Wang, Y.; Wang, F.; Zhang, Q.; Ni, C.; Zhen, Y.; Xu, R.; Liu, Q.; et al. Enterobacterial LPS-inducible LINC00152 is regulated by histone lactylation and promotes cancer cells invasion and migration. *Front. Cell. Infect. Microbiol.* 2022, 12, 913815. <https://doi.org/10.3389/fcimb.2022.913815>.
- Gao, Y.; Zhou, J.; Qi, H.; Wei, J.; Yang, Y.; Yue, J.; Liu, X.; Zhang, Y.; Yang, R. lncRNA lncLy6C induced by microbiota metabolite butyrate promotes differentiation of Ly6C(high) to Ly6C(int/neg) macrophages through lncLy6C/C/EBPbeta/Nr4A1 axis. *Cell Discov.* 2020, 6, 87.
- Lu, X.; Xu, Q.; Tong, Y.; Zhang, Z.; Dun, G.; Feng, Y.; Tang, J.; Han, D.; Mao, Y.; Deng, L.; et al. Long non-coding RNA EVADR induced by *Fusobacterium nucleatum* infection promotes colorectal cancer metastasis. *Cell Rep.* 2022, 40, 111127. <https://doi.org/10.1016/j.celrep.2022.111127>.
- Thiery, J.P.; Acloque, H.; Huang, R.Y.J.; Nieto, M.A. Epithelial-Mesenchymal Transitions in Development and Disease. *Cell* 2009, 139, 871–890. <https://doi.org/10.1016/j.cell.2009.11.007>.
- Lv, C.; Yu, H.; Wang, K.; Chen, C.; Tang, J.; Han, F.; Mai, M.; Ye, K.; Lai, M.; Zhang, H. ENO2 Promotes Colorectal Cancer Metastasis by Interacting with the lncRNA CYTOR and Activating YAP1-Induced EMT. *Cells* 2022, 11, 2363. <https://doi.org/10.3390/cells11152363>.
- Huang, B.; Song, J.H.; Cheng, Y.; Abraham, J.M.; Ibrahim, S.; Sun, Z.; Ke, X.; Meltzer, S.J. Long non-coding antisense RNA KRT7-AS is activated in gastric cancers and supports cancer cell progression by increasing KRT7 expression. *Oncogene* 2016, 35, 4927–4936. <https://doi.org/10.1038/onc.2016.25>.
- Hong, J.; Guo, F.; Lu, S.-Y.; Shen, C.; Ma, D.; Zhang, X.; Xie, Y.; Yan, T.; Yu, T.; Sun, T.; et al. *F. nucleatum* targets lncRNA ENO1-IT1 to promote glycolysis and oncogenesis in colorectal cancer. *Gut* 2020, 70, 2123–2137. <https://doi.org/10.1136/gutjnl-2020-322780>.
- Wang, G.; Wang, J.; Yin, P.; Xu, K.; Wang, Y.; Shi, F.; Gao, J.; Fu, X. New strategies for targeting glucose metabolism-mediated acidosis for colorectal cancer therapy. *J. Cell. Physiol.* 2018, 234, 348–368. <https://doi.org/10.1002/jcp.26917>.
- Ganapathy-Kanniappan, S.; Geschwind, J.-F.H. Tumor glycolysis as a target for cancer therapy: Progress and prospects. *Mol. Cancer* 2013, 12, 152. <https://doi.org/10.1186/1476-4598-12-152>.

62. Bao, Y.; Tang, J.; Qian, Y.; Sun, T.; Chen, H.; Chen, Z.; Sun, D.; Zhong, M.; Chen, H.; Hong, J.; et al. Long noncoding RNA BFAL1 mediates enterotoxigenic *Bacteroides fragilis*-related carcinogenesis in colorectal cancer via the RHEB/mTOR pathway. *Cell Death Dis.* 2019, 10, 675. <https://doi.org/10.1038/s41419-019-1925-2>.
66. Liu, Q.-Q.; Li, C.-M.; Fu, L.-N.; Wang, H.-L.; Tan, J.; Wang, Y.-Q.; Sun, D.-F.; Gao, Q.-Y.; Chen, Y.-X.; Fang, J.-Y. Entero-toxigenic *Bacteroides fragilis* induces the stemness in colorectal cancer via upregulating histone demethylase JMJD2B. *Gut Microbes* 2020, 12, 1788900. <https://doi.org/10.1080/19490976.2020.1788900>.
68. Pham, T.P.; van Bergen, A.S.; Kremer, V.; Glaser, S.F.; Dimmeler, S.; Boon, R.A. LncRNA AERRIE Is Required for Sulfatase 1 Expression, but Not for Endothelial-to-Mesenchymal Transition. *Int. J. Mol. Sci.* 2021, 22, 8088.
71. Ai, X.; Do, A.-T.; Lozynska, O.; Kusche-Gullberg, M.; Lindahl, U.; Emerson, C.P., Jr. QSulf1 remodels the 6-O sulfation states of cell surface heparan sulfate proteoglycans to promote Wnt signaling. *J. Cell Biol.* 2003, 162, 341–351. <https://doi.org/10.1083/jcb.200212083>.
76. Bain, C.C.; Mowat, A.M. Macrophages in intestinal homeostasis and inflammation. *Immunol. Rev.* 2014, 260, 102–117. <https://doi.org/10.1111/imr.12192>.
77. Li, Y.-H.; Zhang, Y.; Pan, G.; Xiang, L.-X.; Luo, D.-C.; Shao, J.-Z. Occurrences and Functions of Ly6C(hi) and Ly6C(lo) Macrophages in Health and Disease. *Front. Immunol.* 2022, 13, 901672.
78. Zigmond, E.; Varol, C.; Farache, J.; Elmaliyah, E.; Satpathy, A.T.; Friedlander, G.; Mack, M.; Shpigel, N.; Boneca, I.G.; Murphy, K.M.; et al. Ly6C hi monocytes in the inflamed colon give rise to proinflammatory effector cells and migratory anti-gen-presenting cells. *Immunity* 2012, 37, 1076–1090.
